# Supplementary material
Source: publisher figshare collection journal article supplement (https://acs.figshare.com/ndownloader/files/4699813)
Supplement: Supplementary file 1 [file 4699813]

Supporting Information for

Catalase and Epoxidation Activity of Manganese Salen  
Complexes Bearing Two Xanthene Scaffolds

Jenny Y. Yang and Daniel G. Nocera\*

*Department of Chemistry, 6-335, Massachusetts Institute of Technology, 77  
Massachusetts Avenue, Cambridge, Massachusetts 02139-4301*

| <i>Index</i>                                                                                                          | <i>Page</i> |
|-----------------------------------------------------------------------------------------------------------------------|-------------|
| Figure S1. $^1\text{H}$ NMR and MS characterization of —(ONN)— ligand impurity produced in the synthesis of <b>13</b> | S2          |
| Figure S2. $\text{O}_2$ evolution (and mass spec) by <b>18</b> after addition of $\text{H}_2\text{O}_2$               | S5          |
| Figure S3. $\text{O}_2$ evolution by <b>15</b> in under phase transfer and homogeneous solution conditions            | S6          |

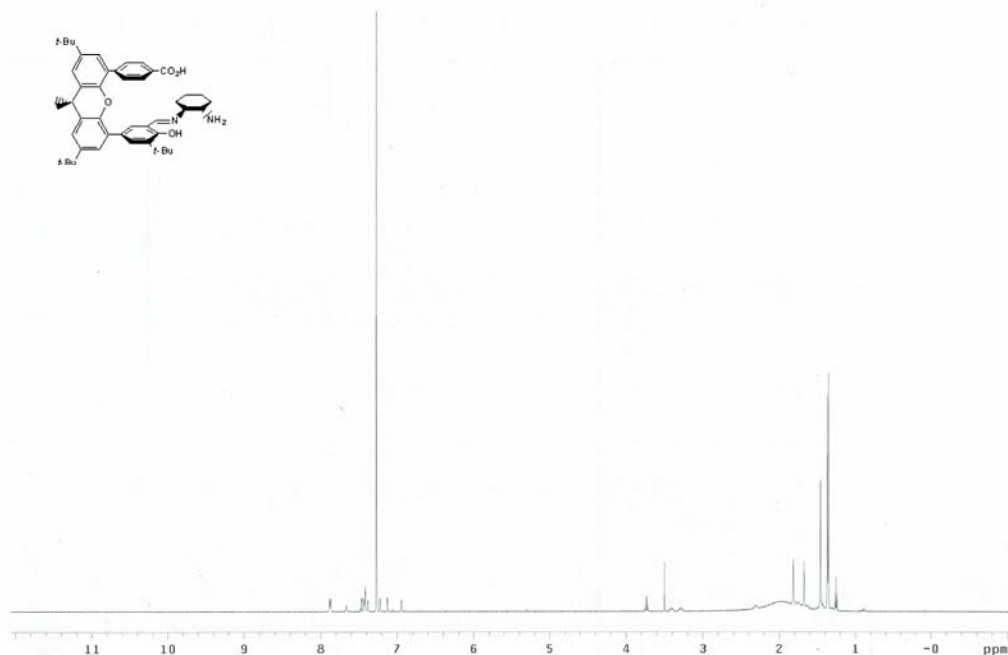

**Figure S1.1.**  $^1\text{H}$  NMR Spectra for —(ONN)— ligand impurity resulting from the condensation reaction of **13** with an excess of (1*R*,2*R*)-(–)-1,2-diaminocyclohexane.

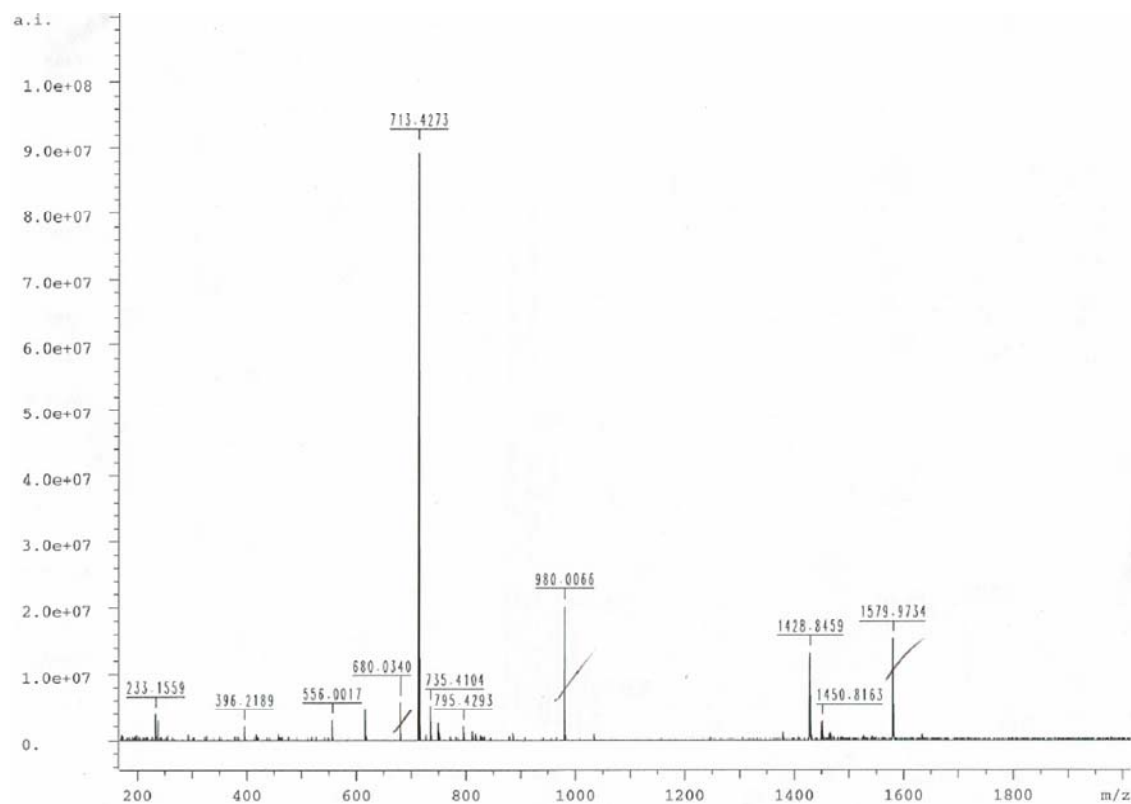

**Figure S1.2.** Mass Spectra for —(ONN)— ligand resulting from the condensation reaction of **13** with an excess of (1*R*,2*R*)-(–)-1,2-diaminocyclohexane. The peaks with a slash through them correspond to the added internal standard.

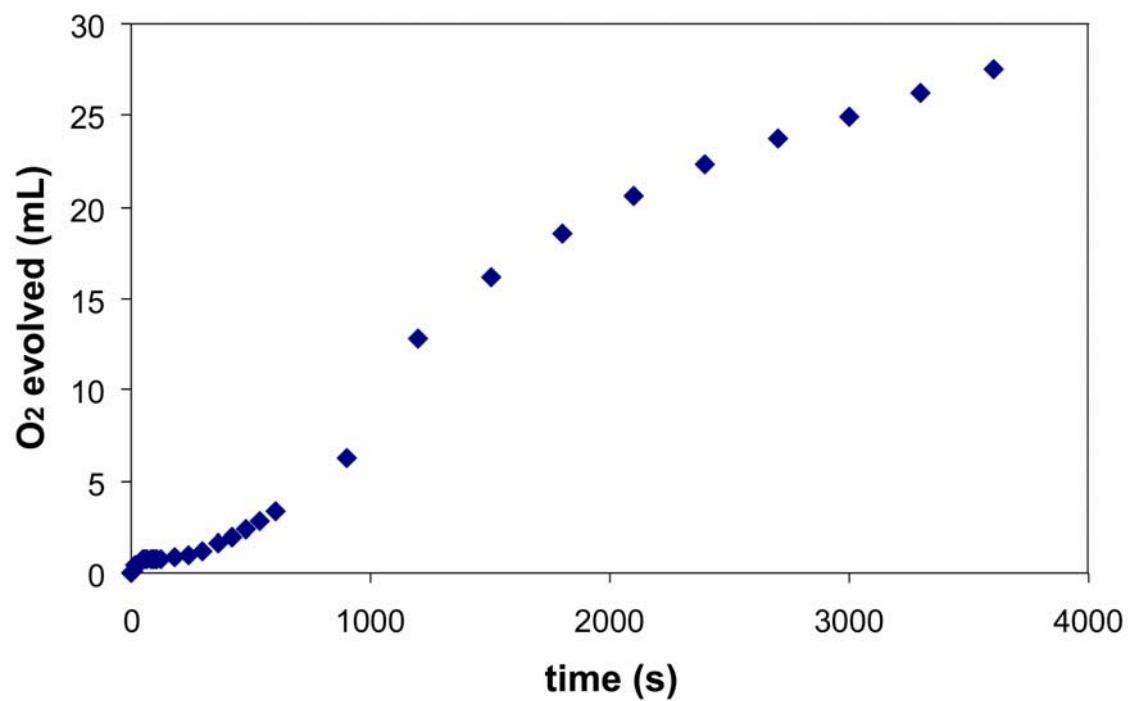

**Figure S2.1.** Oxygen release from hydrogen peroxide dismutation catalyzed by manganese compound **18** over one hour.

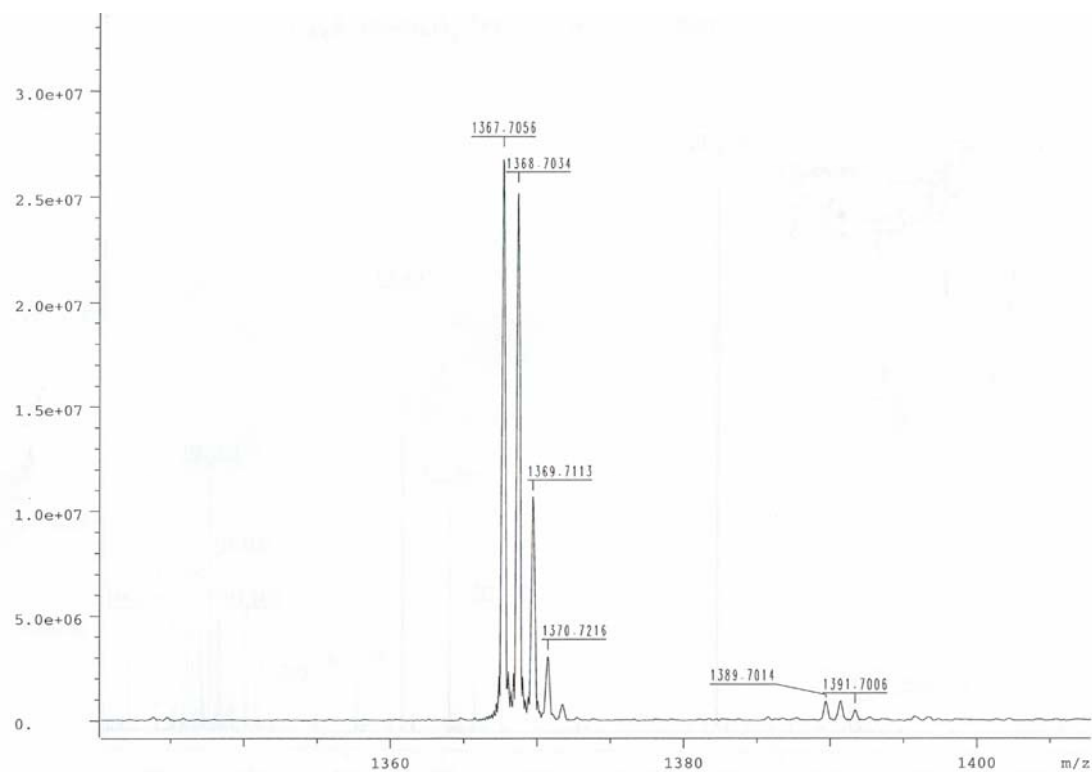

**Figure S2.2.** Mass spectra evidence of the doubly deprotected species from the crude product isolated 20 minutes after addition of H<sub>2</sub>O<sub>2</sub> to manganese catalyst **18**.

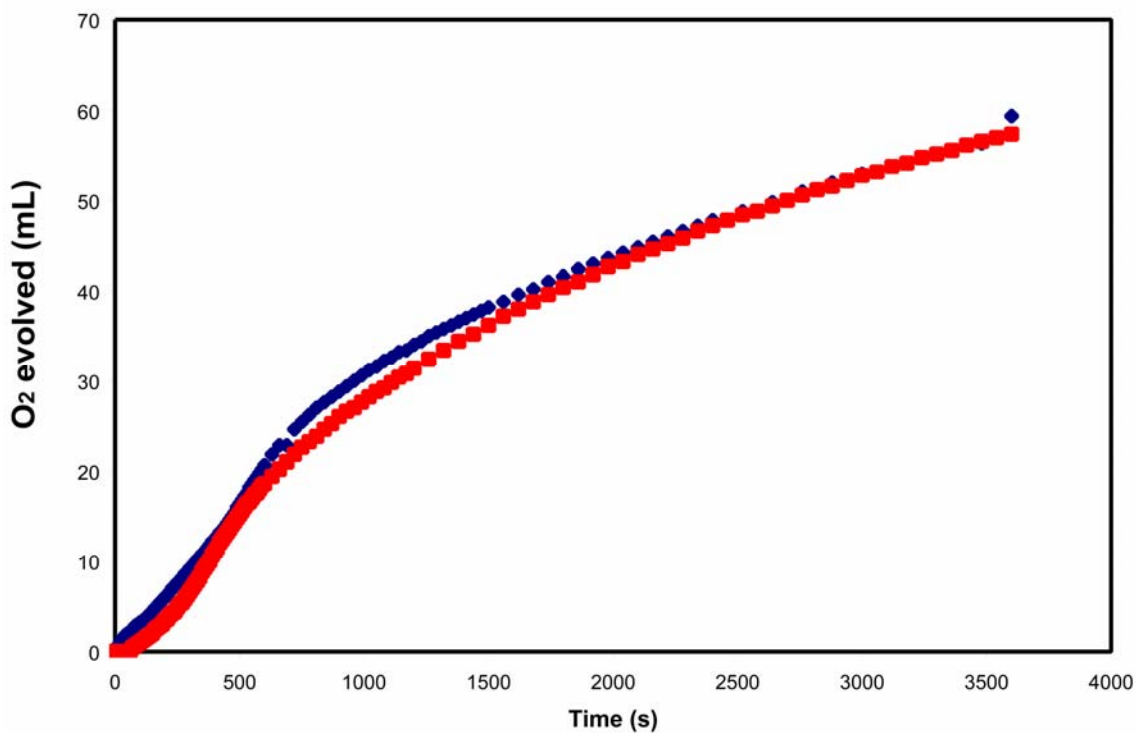

**Figure S3.** Oxygen release from hydrogen peroxide dismutation catalyzed by manganese compound **15** in (i) 2:1 dichloromethane:methanol (♦) and (ii) 2:1 tetrahydrofuran:methanol (■) over one hour under the same substrate and catalyst conditions.
